# Supplementary material
Source: PubMed Central journal article supplement (PMC5026300)
Supplement: NIHMS69897-supplement-Supporitng_Information.pdf [file NIHMS69897-supplement-Supporitng_Information.pdf]

# Single-Step Purification of Ovalbumin from Egg White Using Aqueous Biphasic Systems

Matheus M. Pereira<sup>1</sup>, Rafaela A. P. Cruz<sup>1</sup>, Mafalda R. Almeida<sup>1</sup>, Álvaro S. Lima<sup>2</sup>, João A. P. Coutinho<sup>1</sup> and Mara G. Freire<sup>1\*</sup>

<sup>1</sup>CICECO-Aveiro Institute of Materials, Department of Chemistry, University of Aveiro, 3810-193 Aveiro, Portugal

<sup>2</sup>Programa de Pós-Graduação em Engenharia de Processos, Universidade Tiradentes, Farolândia, CEP 49032-490 Aracaju, SE, Brazil

\*Corresponding author

Tel: +351-234401422; Fax: +351-234-370084; E-mail address: maragfreire@ua.pt

## Supporting Information

**Table S1**

Experimental weight fraction data for the systems composed of PEG 400 (1) + C<sub>6</sub>H<sub>5</sub>K<sub>3</sub>O<sub>7</sub>/C<sub>6</sub>H<sub>8</sub>O<sub>7</sub> (2) + H<sub>2</sub>O (3) at 25°C.

| pH 5               |                    | pH 6               |                    | pH 8               |                    |
|--------------------|--------------------|--------------------|--------------------|--------------------|--------------------|
| 100 w <sub>1</sub> | 100 w <sub>2</sub> | 100 w <sub>1</sub> | 100 w <sub>2</sub> | 100 w <sub>1</sub> | 100 w <sub>2</sub> |
| 13.8784            | 44.0714            | 12.7242            | 41.2876            | 68.0207            | 1.4982             |
| 15.8030            | 41.1839            | 13.5478            | 39.3030            | 60.6933            | 2.8980             |
| 17.1646            | 38.9245            | 14.7701            | 37.6565            | 57.5232            | 3.7124             |
| 19.3922            | 36.7353            | 15.7787            | 35.3873            | 54.2955            | 4.3635             |
| 21.0099            | 34.8396            | 16.2211            | 34.0678            | 51.6291            | 5.1016             |
| 23.5517            | 32.7621            | 17.5670            | 32.2227            | 48.3830            | 6.0044             |
| 25.2393            | 31.1759            | 18.7109            | 30.6367            | 44.8083            | 6.9456             |
| 26.8034            | 29.9046            | 19.9625            | 29.1688            | 40.2519            | 8.2738             |
| 28.2945            | 28.6035            | 21.6725            | 27.7436            | 39.5334            | 8.5822             |
| 29.5790            | 27.4259            | 23.4239            | 26.5159            | 38.7919            | 8.9058             |
| 31.3389            | 26.2354            | 23.8886            | 25.6818            | 38.0258            | 9.2458             |
| 32.3955            | 25.2020            | 25.2992            | 24.6300            | 37.2332            | 9.6035             |
| 32.6902            | 24.6885            | 26.6489            | 23.6464            | 36.3949            | 9.9819             |
| 34.1753            | 23.6390            | 27.8100            | 22.7248            | 35.5420            | 10.3786            |
| 35.7246            | 22.6037            | 28.9584            | 21.9689            | 34.6619            | 10.7976            |
| 36.4717            | 21.9259            | 29.8614            | 21.2308            | 33.7523            | 11.2408            |
| 37.6852            | 21.0508            | 30.7524            | 20.4976            | 32.8105            | 11.7106            |
| 39.0763            | 20.1973            | 32.3364            | 19.6229            | 31.8337            | 12.2092            |
| 41.3708            | 19.1531            | 33.2482            | 18.9739            | 30.7015            | 12.7517            |
| 42.1115            | 18.5689            | 34.3542            | 18.2869            | 29.8047            | 13.3088            |
| 44.3205            | 17.4301            |                    |                    | 28.9110            | 13.8516            |
|                    |                    |                    |                    | 27.2947            | 14.6005            |

|         |         |
|---------|---------|
| 26.3131 | 15.2395 |
| 25.7023 | 15.7740 |
| 25.1869 | 16.2964 |
| 23.8576 | 17.0889 |
| 22.5121 | 17.9341 |
| 21.8801 | 18.5595 |
| 20.4643 | 19.4835 |
| 19.2419 | 20.3042 |
| 18.4269 | 21.1170 |
| 16.6452 | 22.2122 |
| 15.7167 | 23.1358 |
| 13.7114 | 24.4315 |
| 11.3638 | 25.9401 |
| 10.3368 | 27.0210 |
| 7.8421  | 28.7068 |
| 6.4377  | 31.3587 |

**Table S2**

Experimental weight fraction data for the systems composed of PEG (1) + C<sub>6</sub>H<sub>5</sub>K<sub>3</sub>O<sub>7</sub>/C<sub>6</sub>H<sub>8</sub>O<sub>7</sub> (2) + H<sub>2</sub>O (3) at 25°C and pH 7.

| PEG 400            |                    | PEG 600            |                    | PEG 1000           |                    |
|--------------------|--------------------|--------------------|--------------------|--------------------|--------------------|
| 100 w <sub>1</sub> | 100 w <sub>2</sub> | 100 w <sub>1</sub> | 100 w <sub>2</sub> | 100 w <sub>1</sub> | 100 w <sub>2</sub> |
| 82.6364            | 2.7688             | 85.9890            | 1.7175             | 57.8766            | 5.9077             |
| 75.1384            | 3.7415             | 75.6691            | 3.2334             | 52.8615            | 6.5404             |
| 69.3176            | 4.8225             | 66.0885            | 4.1373             | 47.5771            | 7.0310             |
| 64.5254            | 5.9201             | 61.2011            | 5.2283             | 43.2552            | 8.0531             |
| 60.4327            | 6.9732             | 57.0016            | 6.2553             | 40.5045            | 9.0397             |
| 56.8465            | 7.0909             | 53.3512            | 7.1548             | 38.5181            | 9.3272             |
| 53.6422            | 8.1477             | 48.9937            | 7.7503             | 37.3214            | 9.7977             |
| 50.7347            | 9.1522             | 45.9932            | 8.3937             | 36.3024            | 10.2048            |
| 50.3763            | 9.2678             | 43.8617            | 9.0435             | 34.8850            | 10.7059            |
| 44.9721            | 10.9316            | 41.6540            | 9.5154             | 33.3928            | 11.0325            |
| 42.1959            | 12.4068            | 40.2461            | 10.0757            | 32.4179            | 11.4377            |
| 40.9067            | 12.9465            | 38.8544            | 10.6452            | 31.5184            | 11.7518            |
| 39.3859            | 13.5980            | 37.2160            | 11.0289            | 30.6611            | 12.1286            |
| 37.4982            | 14.6429            | 36.0051            | 11.5597            | 29.8253            | 12.4888            |
| 36.3936            | 15.1547            | 34.9330            | 12.0149            | 29.0518            | 12.8247            |
| 35.2881            | 15.5759            | 34.0072            | 12.4572            | 28.2799            | 13.2131            |
| 33.4970            | 16.6700            | 33.1104            | 12.8165            | 27.6278            | 13.4697            |
| 32.0660            | 17.4791            | 32.2384            | 13.1799            | 26.9766            | 13.6716            |
| 30.7214            | 18.2968            | 31.3807            | 13.4793            | 26.3515            | 13.9313            |
| 29.4833            | 19.0725            | 30.5355            | 13.8412            | 24.6438            | 14.6031            |
| 28.5894            | 19.5448            | 29.4578            | 14.5832            | 24.1790            | 14.9130            |
| 27.4451            | 20.3323            | 27.6537            | 15.0870            | 23.3543            | 15.3366            |

|         |         |         |         |         |         |
|---------|---------|---------|---------|---------|---------|
| 26.1742 | 21.1703 | 25.0088 | 16.1531 | 22.7360 | 15.7350 |
| 25.2695 | 21.6338 | 22.7269 | 17.7926 | 21.5921 | 16.2943 |
| 24.0984 | 22.5744 | 22.2983 | 18.1895 | 20.3070 | 16.8851 |
| 23.0210 | 23.3475 | 21.4583 | 18.7162 | 19.3895 | 17.4345 |
| 22.9418 | 24.0731 | 20.7102 | 19.2075 | 17.9807 | 18.1916 |
| 22.1722 | 24.6153 | 19.8200 | 19.7896 | 16.8277 | 18.8238 |
| 21.4621 | 25.0926 | 18.8294 | 20.4667 | 15.9315 | 19.3771 |
| 20.9712 | 25.4513 | 18.6367 | 21.3598 | 14.7080 | 20.0678 |
| 20.8230 | 25.7781 | 16.6079 | 22.1350 | 13.0007 | 20.8642 |
| 20.3333 | 26.0970 | 16.0212 | 22.5600 | 11.7033 | 21.7123 |
| 20.4662 | 26.1916 | 14.8776 | 23.3935 | 10.9790 | 22.2316 |
| 19.9953 | 26.5007 | 13.5874 | 24.3492 | 9.4577  | 23.0413 |
| 19.4360 | 26.9010 | 12.1340 | 25.3038 | 8.8034  | 23.6258 |
| 17.7018 | 29.0287 | 10.4744 | 26.5086 | 7.1315  | 24.5652 |
| 16.9222 | 30.0241 | 9.6662  | 27.1884 | 6.3816  | 25.3675 |
| 15.8030 | 32.5812 | 8.6476  | 28.1055 | 5.3984  | 26.0209 |
| 15.3813 | 32.7344 | 7.5462  | 29.1223 | 3.4627  | 28.1891 |
| 14.1924 | 33.5291 | 6.5676  | 30.2392 |         |         |
| 13.3104 | 35.7602 | 5.6147  | 31.3011 |         |         |
| 12.4501 | 37.8980 | 3.6603  | 33.7064 |         |         |
| 11.8434 | 39.2537 |         |         |         |         |

---

**Table S3**

Partition coefficients ( $K_{Ova}$ ) and extraction efficiencies ( $EE\%_{Ova}$ ) of ovalbumin and weight fraction compositions of the initial mixtures at 25°C.

| PEG | pH | Weight fraction composition / (wt %) |                                                                                                           | $K_{Ova} \pm \sigma$ | $EE\%_{Ova} \pm \sigma$ |
|-----|----|--------------------------------------|-----------------------------------------------------------------------------------------------------------|----------------------|-------------------------|
|     |    | PEG                                  | C <sub>6</sub> H <sub>5</sub> K <sub>3</sub> O <sub>7</sub> /C <sub>6</sub> H <sub>8</sub> O <sub>7</sub> |                      |                         |
| 400 | 5  | 30.01                                | 29.99                                                                                                     | 12.6 ± 0.3           | 94.8 ± 0.7              |
|     | 6  | 29.99                                | 29.85                                                                                                     | 32.8 ± 0.3           | 96.1 ± 0.1              |
|     | 7  | 29.98                                | 29.97                                                                                                     | 54.7 ± 0.1           | 97.7 ± 0.7              |
|     | 8  | 30.13                                | 29.84                                                                                                     | 52.4 ± 0.1           | 96.5 ± 0.5              |

**Table S4**

Partition coefficients ( $K_{Ova}$ ) and extraction efficiencies ( $EE\%_{Ova}$ ) of ovalbumin and weight fraction compositions of the initial mixtures at 25°C and pH 7.

| PEG  | Weight fraction composition / (wt %) |                                                                                                           | $K_{Ova} \pm \sigma$ | $EE\%_{Ova} \pm \sigma$ |
|------|--------------------------------------|-----------------------------------------------------------------------------------------------------------|----------------------|-------------------------|
|      | PEG                                  | C <sub>6</sub> H <sub>5</sub> K <sub>3</sub> O <sub>7</sub> /C <sub>6</sub> H <sub>8</sub> O <sub>7</sub> |                      |                         |
| 400  | 24.75                                | 25.28                                                                                                     | 76.4 ± 0.4           | 98.8 ± 0.7              |
|      | 29.98                                | 19.97                                                                                                     | 89.5 ± 0.2           | 98.9 ± 0.1              |
|      | 30.05                                | 24.97                                                                                                     | 76.4 ± 0.6           | 98.8 ± 0.8              |
|      | 30.01                                | 29.84                                                                                                     | 54.7 ± 1.0           | 97.6 ± 0.5              |
|      | 35.72                                | 24.97                                                                                                     | 74.4 ± 0.4           | 98.4 ± 0.7              |
| 600  | 25.05                                | 24.98                                                                                                     | 54.5 ± 0.1           | 97.1 ± 0.4              |
|      | 30.13                                | 20.38                                                                                                     | 55.7 ± 0.4           | 96.1 ± 0.3              |
|      | 30.21                                | 25.44                                                                                                     | 54.7 ± 0.5           | 97.1 ± 0.3              |
|      | 29.79                                | 30.01                                                                                                     | 52.7 ± 0.9           | 97.8 ± 0.1              |
|      | 35.06                                | 24.98                                                                                                     | 34.7 ± 0.6           | 97.7 ± 0.5              |
| 1000 | 24.93                                | 25.42                                                                                                     | 35.5 ± 0.6           | 95.6 ± 0.4              |
|      | 29.94                                | 20.01                                                                                                     | 12.7 ± 0.2           | 93.6 ± 0.8              |
|      | 29.87                                | 25.06                                                                                                     | 35.5 ± 0.3           | 95.6 ± 0.7              |
|      | 30.10                                | 29.93                                                                                                     | 51.6 ± 0.9           | 97.8 ± 0.4              |
|      | 34.95                                | 25.15                                                                                                     | 22.1 ± 0.2           | 95.2 ± 0.9              |

**Table S5**

Partition coefficients ( $K_{Ova}$ ) and extraction efficiencies ( $EE\%_{Ova}$ ) of ovalbumin from egg white and weight fraction compositions of the initial mixtures at 25°C and pH 7.

| PEG  | Weight fraction composition / (wt %) |                          | $K_{Ova} \pm \sigma$ | $EE\%_{Ova} \pm \sigma$ |
|------|--------------------------------------|--------------------------|----------------------|-------------------------|
|      | PEG                                  | $C_6H_5K_3O_7/C_6H_8O_7$ |                      |                         |
| 400  | 25.43                                | 25.28                    | $74.4 \pm 0.6$       | $98.4 \pm 0.3$          |
| 600  | 24.65                                | 25.05                    | $34.7 \pm 0.6$       | $97.7 \pm 0.1$          |
| 1000 | 25.16                                | 25.35                    | $22.1 \pm 0.1$       | $95.2 \pm 0.9$          |
